# Supplementary material for: MTF1 Is Essential for the Expression of MT1B, MT1F, MT1G, and MT1H Induced by PHMG, but Not CMIT, in the Human Pulmonary Alveolar Epithelial Cells
Source: MDPI journal article supplement (doi:10.3390/toxics9090203), 2021-08-29
Supplement: s1 [file s1]

# Supplementary Materials: MTF1 is essential for the expression of MT1B, MT1F, MT1G, and MT1H induced by PHMG, but not CMIT, in the human pulmonary alveolar epithelial cells

Sang-Hoon Jeong, Cherry Kim, Jaeyoung Kim, Yoon-Jeong Nam, Hong Lee, Ariunaa Togloom, Ja-Young Kang, Jin-Young Choi, Hyejin Lee, Myeong-Ok Song, Eun-Kee Park, Yong-Wook Baek, Ju-Han Lee and Ki-Yeol Lee

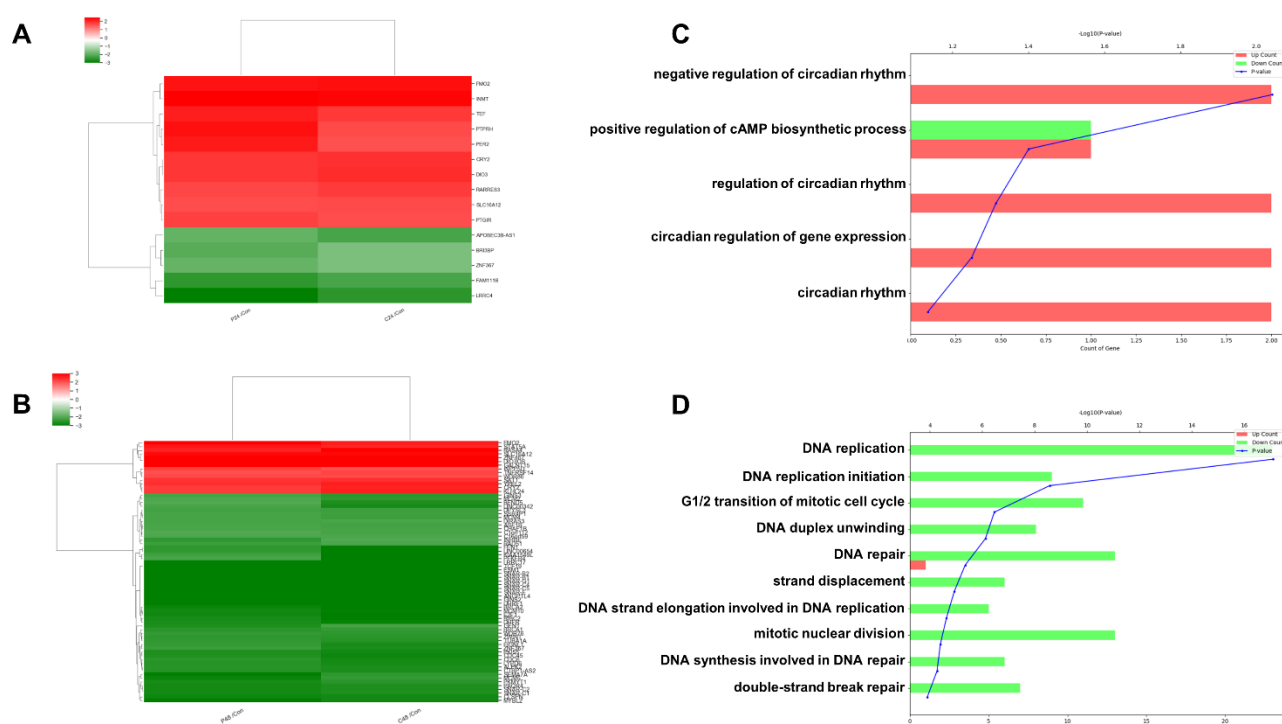

**Figure S1.** Effects of PHMG and CMIT on the gene expression of HPAEpiCs. (A) Heatmap of selected genes (more than 3-fold;  $p < 0.05$ ) in HPAEpiCs after exposure to 2  $\mu\text{g/mL}$  of PHMG or CMIT for 24 h. (B) Heatmap of selected genes (more than 4-fold;  $p < 0.01$ ) in HPAEpiCs after exposure to 2  $\mu\text{g/mL}$  of PHMG or CMIT for 48 h. Gene ontology enrichment analysis of the top 10 biological processes for selected genes after exposure to PHMG or CMIT for 24 h (C) and 48 h (D).
